# Supplementary figures and images for: Assay for molecular transport across gap junction channels in one-dimensional cell arrays
Source: Royal Society of Chemistry journal article supplement (doi:10.1039/c0lc00350f), 2011-01-01

**A**

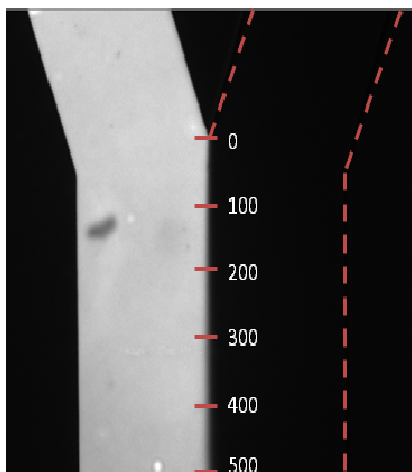

**B**

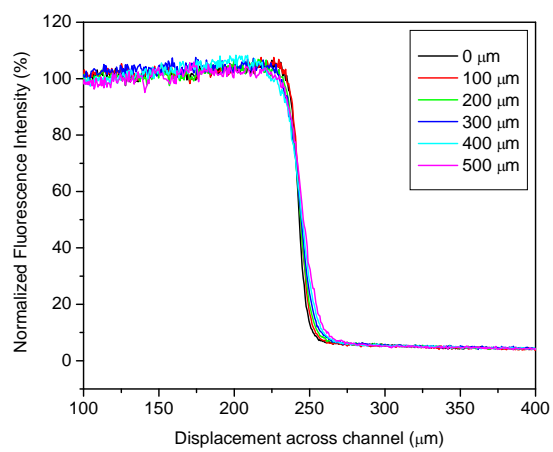

**SI-1. Ye, et. al.**

Supplement: si_1_figure.pdf [file si_1_figure.pdf]
